# Supplementary material
Source: MDPI journal article supplement (https://www.mdpi.com/2073-4441/14/15/2348)
Supplement: s1 [file s1]

## Supporting Information

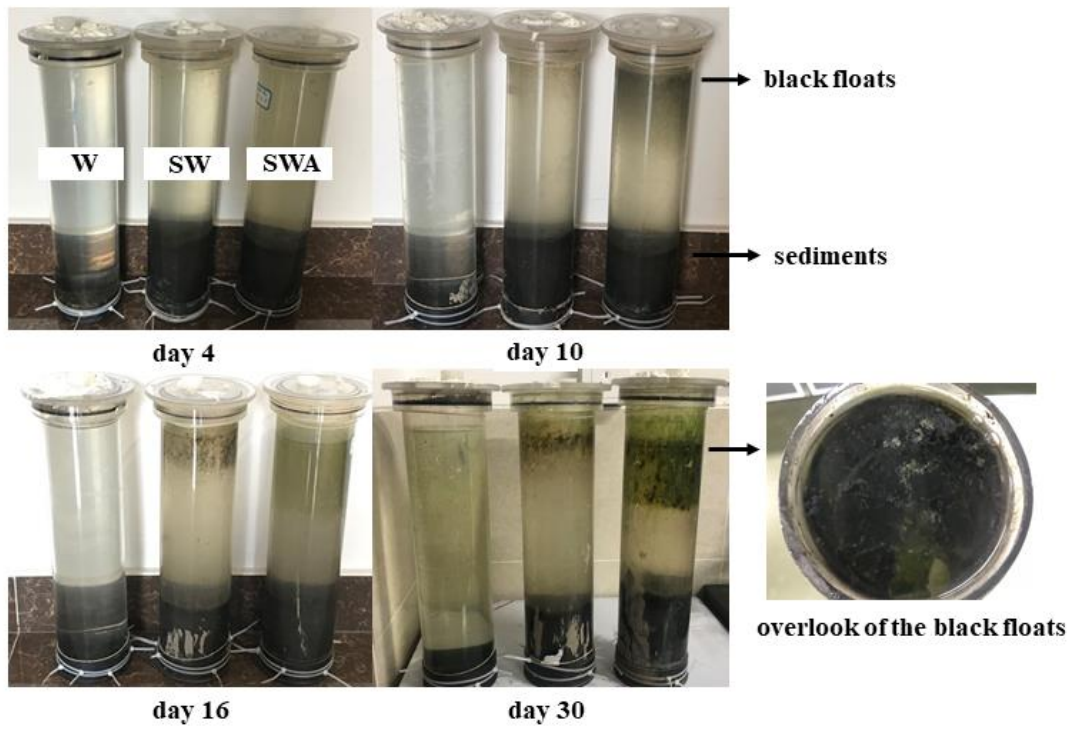

**Figure S1.** Variation in blackness of the different columns during black blooms simulation. (Left to right: W, water; SW, sediments-water; SWA, sediments-water-algae).
